# Supplementary material for: Assessment of SARS-CoV-2 infectivity of upper respiratory specimens from COVID-19 patients by virus isolation using VeroE6/TMPRSS2 cells
Source: HighWire-hosted journal article supplement (doi:10.1136/bmjresp-2020-000830), 2021-02-01
Supplement: bmjresp-2020-000830supp001_data_supplement.pdf [file bmjresp-2020-000830supp001_data_supplement.pdf]

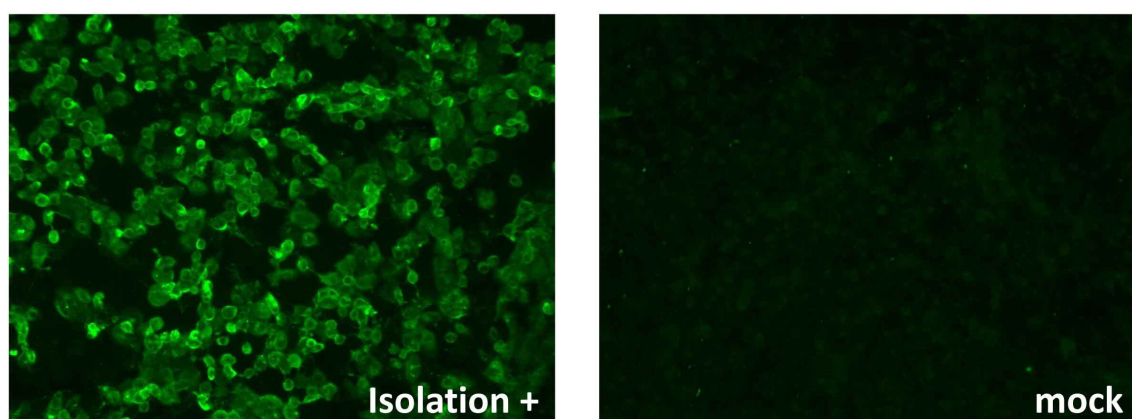

**Figure S1. Identification of SARS-CoV-2 spike antigen.** Vero 9013 cells were inoculated with culture supernatants of CPE positive cells. The SARS-CoV-2 spike antigen was detected by using an immunofluorescence assay with serum from rabbit immunized with recombinant receptor-binding protein (a.a. 330-529 of spike protein) of SARS-CoV-2, followed by staining with fluorescence-labeled anti-rabbit IgG. An example of isolation-positive result was shown. Mock-inoculated Vero 9013 cells was used as a negative control.
